# Supplementary material
Source: Springer Nature journal article supplement (https://www.springermedizin.de/resource/supplementary/13045_2010_106_MOESM1_ESM.pdf/9660672)

**A**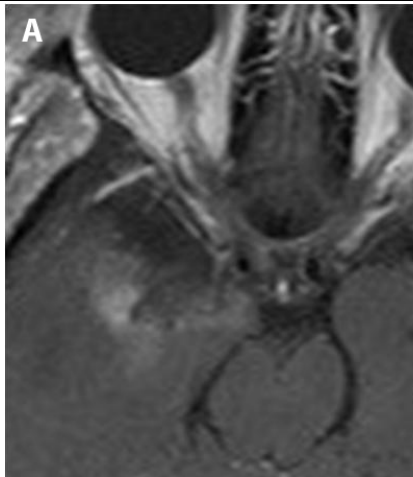**B**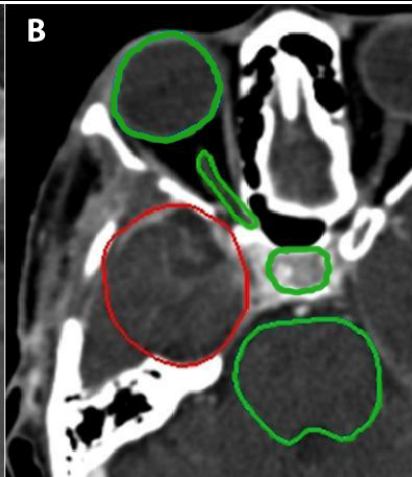**C**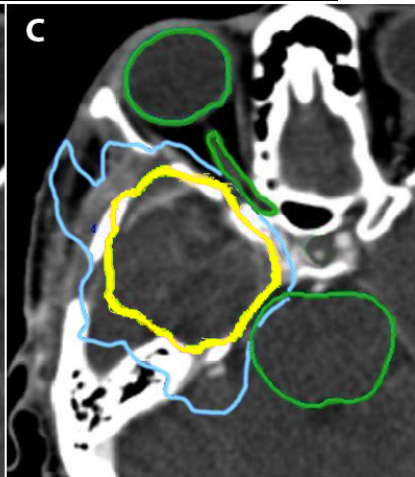

Supplement: MOESM1 [file 9660672]
